# Supplementary material for: Repressor element-1 silencing transcription factor/neuronal restrictive silencer factor (REST/NRSF) can regulate HSV-1 immediate-early transcription via histone modification
Source: Springer Nature journal article supplement (doi:10.1186/1743-422x-4-56), 2007-06-07
Supplement: 12985_2007_269_MOESM1_ESM.pdf [file 12985_2007_269_MOESM1_ESM.pdf]

**A.**

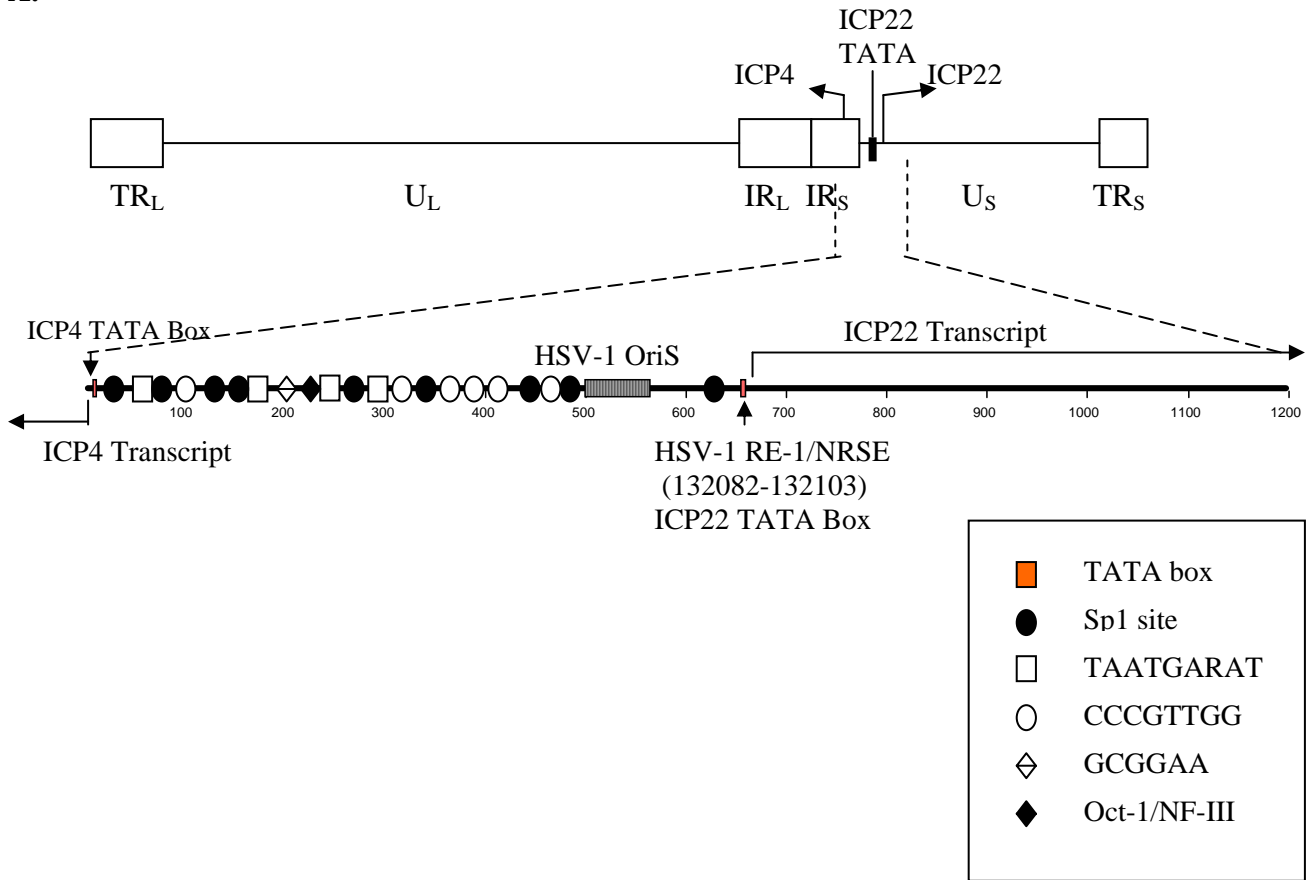

**B.**

HSV-1 RE-1  
Consensus RE-1

5' - **TTATGTG**CGCCGAGAGACCC - 3'  
5' - NNCAGCACCNCGGASAGNNNC - 3'  
\* \* \* \* \*
