# Supplementary material for: Repressor element-1 silencing transcription factor/neuronal restrictive silencer factor (REST/NRSF) can regulate HSV-1 immediate-early transcription via histone modification
Source: Springer Nature journal article supplement (doi:10.1186/1743-422x-4-56), 2007-06-07

**A.**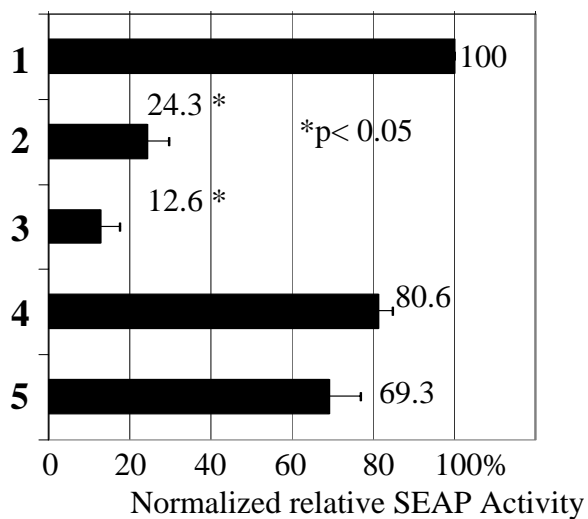**B.**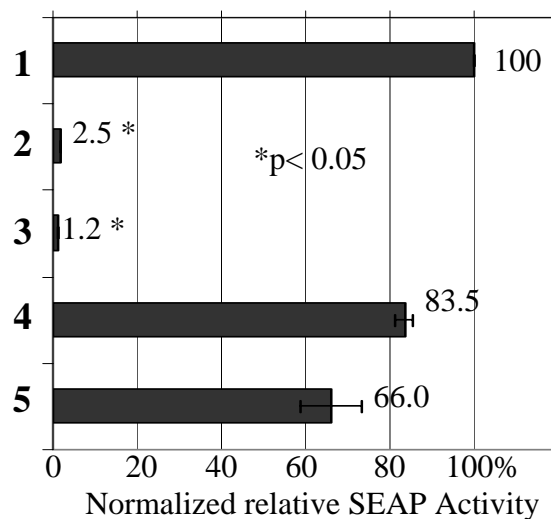**C.**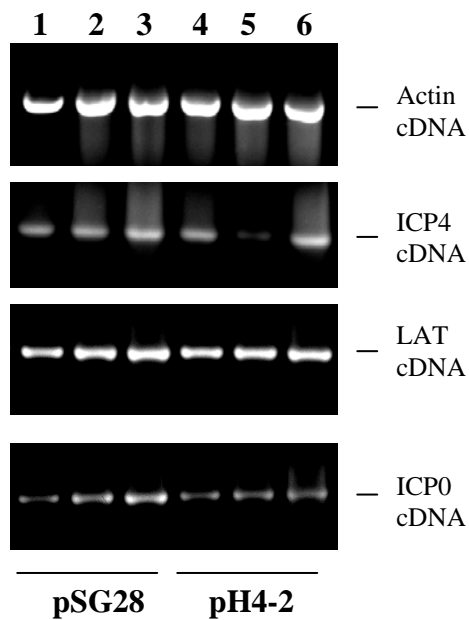**D.**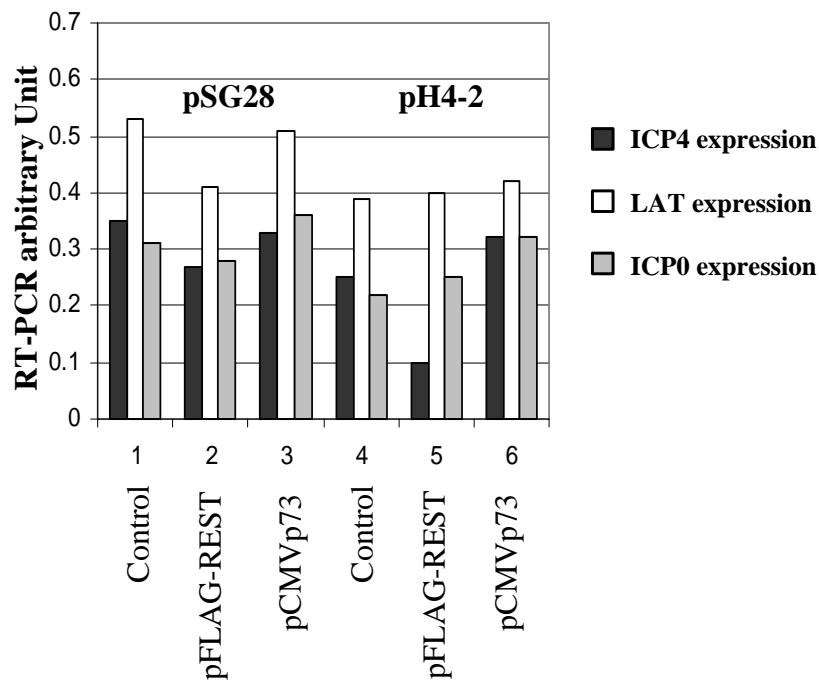

Supplement: 12985_2007_269_MOESM2_ESM.pdf [file 12985_2007_269_MOESM2_ESM.pdf]
